# Supplementary material for: Direct interaction between the hepatitis B virus core and envelope proteins analyzed in a cellular context
Source: PubMed Central journal article supplement (PMC6838148; doi:10.1038/s41598-019-52824-z), 2019-11-07
Supplement: 41598_2019_52824_MOESM2_ESM.pdf [file 41598_2019_52824_MOESM2_ESM.pdf]

## **Direct interaction between the hepatitis B virus core and envelope proteins analyzed in a cellular context**

Florentin Pastor<sup>1</sup>, Charline Herrscher<sup>1</sup>, Romuald Patient<sup>1</sup>, Sebastien Eymieux<sup>1</sup>, Alain Moreau<sup>1</sup>, Julien Burlaud-Gaillard<sup>2</sup>, Florian Seigneuret<sup>1</sup>, Hugues de Rocquigny<sup>1,\*</sup>, Philippe Roingeard<sup>1,2\*</sup> and Christophe Hourieux<sup>1,2,\*</sup>

<sup>1</sup>: INSERM U1259 MAVIVH – University of Tours and CHRU of Tours, Tours, France

<sup>2</sup>: Plate-Forme IBiSA des Microscopies, PPF ASB – University of Tours and CHRU of Tours, Tours, France.

To whom correspondence should be addressed:

\*: [hourieux@med.univ-tours.fr](mailto:hourieux@med.univ-tours.fr) ; [roingeard@med.univ-tours.fr](mailto:roingeard@med.univ-tours.fr); [hderocquigny@univ-tours.fr](mailto:hderocquigny@univ-tours.fr)

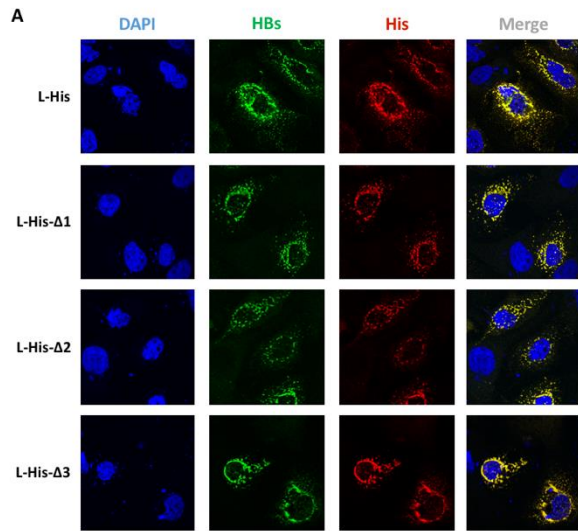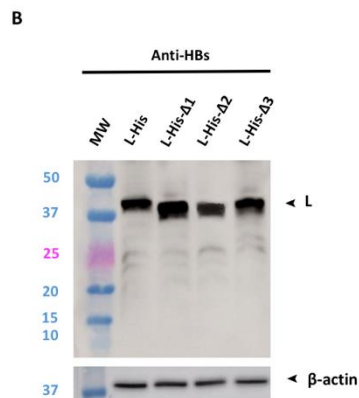

**Figure S2. Expression of the mutant L proteins.** Huh7 cells were transfected by incubation for three days with a plasmid encoding the L-His protein or the L-His- $\Delta$ 1 or L-His- $\Delta$ 2 or L-His- $\Delta$ 3 mutant protein. **(A)** The subcellular distributions of the proteins encoded by all constructs were determined by confocal microscopy after double-staining with anti-HBs (in green) and anti-His (in red) antibodies. Nuclei were labeled with DAPI (in blue). Similar subcellular distributions were observed for all the mutant proteins. **(B)** Cell lysates were subjected to SDS-PAGE, and the resulting protein bands were blotted onto membranes, which were probed with anti-HBs antibody. The levels of the various proteins were compared with those of  $\beta$ -actin for quantification.
