# Supplementary material for: Direct interaction between the hepatitis B virus core and envelope proteins analyzed in a cellular context
Source: PubMed Central journal article supplement (PMC6838148; doi:10.1038/s41598-019-52824-z), 2019-11-07
Supplement: 41598_2019_52824_MOESM6_ESM.pdf [file 41598_2019_52824_MOESM6_ESM.pdf]

**Direct interaction between the hepatitis B virus core and envelope proteins analyzed in a cellular context**

Florentin Pastor<sup>1</sup>, Charline Herrscher<sup>1</sup>, Romuald Patient<sup>1</sup>, Sebastien Eymieux<sup>1</sup>, Alain Moreau<sup>1</sup>, Julien Burlaud-Gaillard<sup>2</sup>, Florian Seigneuret<sup>1</sup>, Hugues de Rocquigny<sup>1,\*</sup>, Philippe Roingeard<sup>1,2\*</sup> and Christophe Hourieux<sup>1,2,\*</sup>

<sup>1</sup>: INSERM U1259 MAVIVH – University of Tours and CHRU of Tours, Tours, France

<sup>2</sup>: Plate-Forme IBiSA des Microscopies, PPF ASB – University of Tours and CHRU of Tours, Tours, France.

To whom correspondence should be addressed:

\*: [hourieux@med.univ-tours.fr](mailto:hourieux@med.univ-tours.fr) ; [roingeard@med.univ-tours.fr](mailto:roingeard@med.univ-tours.fr); [hderocquigny@univ-tours.fr](mailto:hderocquigny@univ-tours.fr)

| Plasmid name                           | Primer sequence                                                                             |
|----------------------------------------|---------------------------------------------------------------------------------------------|
| <b>Envelope proteins constructions</b> |                                                                                             |
| L-His                                  | Fwd : 5' TTA- <b>AGC-TTA</b> -TGG-GAG-GTT-GGT-CAT-CA 3'                                     |
|                                        | Rev : 5' GAC- <b>TCG-AGT</b> -TAG-TGG-TGA-TGG-TGA-TGA-TGA-GCA-TAA-TCA-GGA-ACA-TCA-TAA-GG 3' |
| L                                      | Fwd : 5' AAA- <b>AGC-TTA</b> -TGG-GAG-GTT-GGT-CAT-CA 3'                                     |
|                                        | Rev : 5' TTC- <b>TCG-AGT</b> -TAA-ATG-TAT-ACC-CAG-AGA-CAA-AAG-AAA-ATT-GG 3'                 |
| L-His-Δ1                               | Fwd : 5' CAA-GGC-TCA-CCC-CTC-CAC-ACA-ATC-GGC-AGT-CAG-GAA-GGC-AGC 3'                         |
|                                        | Rev : 5' GCC-TTC-CTG-ACT-GCC-GAT-TGT-GTG-GAG-GGG-TGA-GCC-TTG-G 3'                           |
| L-His-Δ2                               | Fwd : 5' TCC-TCC-TCC-TGC-CTC-CAC-CAC-TGC-CTT-CCA-CCA-AAC-TC 3'                              |
|                                        | Rev : 5' GAG-TTT-GGT-GGA-AGG-CAG-TGG-TGG-AGG-CAG-GAG-GAG 3'                                 |
| L-His-Δ3                               | Fwd : 5' GGC-CAT-GCA-GTG-GAA-TTC-CGG-AAC-AGT-AAA-CCC-TGC-TCC 3'                             |
|                                        | Rev : 5' GAG-CAG-GGT-TTA-CTG-TTC-CGG-AAT-TCC-ACT-GCA-TGG-CCT-G 3'                           |
| S-His                                  | Fwd : 5' TTA- <b>AGC-TTA</b> -TGG-AGA-ACA-TCA-CAT-CAG-GAT-TC 3'                             |
|                                        | Rev : 5' GAC- <b>TCG-AGT</b> -TAG-TGG-TGA-TGG-TGA-TGA-TGA-GCA-TAA-TCA-GGA-ACA-TCA-TAA-GG 3' |
| S                                      | Fwd : 5' AAA- <b>AGC-TTA</b> -TGG-AGA-ACA-TCA-CAT-CAG-GAT-TC 3'                             |
|                                        | Rev : 5' TTC- <b>TCG-AGT</b> -TAA-ATG-TAT-ACC-CAG-AGA-CAA-AAG-AAA-ATT-GG 3'                 |
| <b>Core protein constructions</b>      |                                                                                             |
| Core                                   | Fwd : 5' AAC- <b>TTA-AGG</b> -CGG-CCG-CCG-CCA-CCA-TGG-ATA-TCG-ATC-C 3'                      |
|                                        | Rev : 5' AAG- <b>GGC-CCG</b> -CTA-GCT-TCA-CTA-ACA-TTG-AGA-TTC-CCG-A 3'                      |
| Core-S26A                              | Fwd : 5' CTT-CTT-TCC-TGC-CGT-ACG-AGA-CCT-TC 3'                                              |
|                                        | Rev : 5' TCA-CTC-GGG-AGA-AAC-GAG 3'                                                         |
| Core-L60A                              | Fwd : 5' ATT-GCC-TGC-TGG-GGG-GAG-CTC 3'                                                     |
|                                        | Rev : 5' TGC-TTG-CCT-GAG-GGC-AGT-ATG 3',                                                    |
| Core-T67A                              | Fwd : 5' GGA-GCT-CAT-GGC-CCT-GGC-CAC-GT 3'                                                  |
|                                        | Rev : 5' CCC-CAG-CAA-AGA-ATT-GCT-TGC 3'                                                     |
| Core-L95A                              | Fwd : 5' TAA-TAT-GGG-TGC-CAA-GTT-CAG-GCA-AC 3'                                              |
|                                        | Rev : 5' GTG-TTG-ACA-TAA-CTG-ACT-AC 3'                                                      |
| Core-K96A                              | Fwd : 5' TAT-GGG-TTT-AGC-CTT-CAG-GCA-ACT-CTT-GTG 3'                                         |
|                                        | Rev : 5' TTA-GTG-TTG-ACA-TAA-CTG-AC 3'                                                      |
| Core-I126A                             | Fwd : 5' AGT-GTG-GGC-CAG-AAC-TCC-TC 3'                                                      |
|                                        | Rev : 5' CCG-AAA-GAC-ACC-AAA-TAT-TCT-ATA-ACT-G 3'                                           |
| Core-Y132A                             | Fwd : 5' TCC-TCC-AGC-TGC-CAG-GCC-TCC-GA 3'                                                  |
|                                        | Rev : 5' GTT-CTG-ATC-CAC-ACT-CCG 3'                                                         |

**Supplemental Table 2. Primers used for polymerase chain reactions.** The forward (Fwd) and reverse (Rev) primers for the WT S and L constructs contain *Hind*III and *Xho*I restriction sites (in bold, AAGCTT and CTCGAG, respectively). They were used for the generation of all envelope protein constructs from pcDNA3.1(+). The primers for the L-Δ1-His, L-Δ2-His and L-Δ3-His mutants deleted the chosen sequence (72-97, 98-124 or 125-148 residues,

respectively). The primers for the WT core protein contain *Afl*III and *Apa*I restriction sites (in bold, CTTAAG and GGGCCC, respectively) for cloning in pCDNA3.1(+). The primers for the core-S26A, -L60A, -T67A, -L95A, -K96A, -I126A and -Y132A mutants replaced the chosen amino-acid residue with an alanine.
